# Supplementary material
Source: PubMed Central journal article supplement (PMC1691537)
Supplement: 14667343s01.pdf [file 14667343s01.pdf]

These are electronic appendices to the paper by Ruta *et al.* 2003 A supertree of early tetrapods. *Proc. R. Soc. Lond. B* **270**, 2507–2516. (DOI 10.1098/rspb.2003.2524.)

Electronic appendices are refereed with the text. However, no attempt is made to impose a uniform editorial style on the electronic appendices.

# Electronic Appendix A

#NEXUS

[MacClade 3.05 registered to Mark Thomas, Biol. Anth. Cambridge.]

BEGIN DATA;

DIMENSIONS NTAX=226 NCHAR=958;

FORMAT MISSING=? GAP=- ;

CHARLABELS

|       |                          |       |   |       |   |       |   |       |   |
|-------|--------------------------|-------|---|-------|---|-------|---|-------|---|
| [1]   | 'Klembara-Ruta2003/1'    | [2]   |   | [3]   |   | [4]   | - | [5]   | - |
| [6]   |                          | [7]   |   | [8]   |   | [9]   |   | [10]  |   |
| [11]  | -                        | [12]  | - | [13]  | - | [14]  | - | [15]  | - |
| [16]  | -                        | [17]  | - | [18]  | - | [19]  | - | [20]  | - |
| [21]  | -                        | [22]  | - | [23]  | - | [24]  | - | [25]  | - |
| [26]  | -                        | [27]  | - | [28]  | - | [29]  | - | [30]  | - |
| [31]  | 'Anderson_2003/1'        | [32]  | - | [33]  | - | [34]  | - | [35]  | - |
| [36]  |                          | [37]  |   | [38]  |   | [39]  |   | [40]  |   |
| [41]  | 'Damiani-Kitching2003/1' |       |   | [42]  |   | [43]  |   | [44]  |   |
|       |                          |       |   |       |   |       |   |       |   |
| [46]  |                          | [47]  |   | [48]  |   | [49]  |   | [50]  |   |
| [51]  | -                        | [52]  | - | [53]  | - | [54]  | - | [55]  | - |
| [56]  | -                        | [57]  | - | [58]  | - | [59]  | - | [60]  | - |
| [61]  | -                        | [62]  | - | [63]  | - | [64]  | - | [65]  | - |
| [66]  | -                        | [67]  | - | [68]  | - | [69]  | - | [70]  | - |
| [71]  | -                        | [72]  | - | [73]  | - | [74]  | - | [75]  | - |
| [76]  | -                        | [77]  | - | [78]  | - | [79]  | - | [80]  | - |
| [81]  | -                        | [82]  | - | [83]  | - | [84]  | - | [85]  | - |
| [86]  | 'Ruta_et_al2003/1'       |       |   | [87]  |   | [88]  |   | [89]  |   |
| [91]  |                          | [92]  |   | [93]  |   | [94]  |   | [95]  |   |
| [96]  | -                        | [97]  | - | [98]  | - | [99]  | - | [100] | - |
| [101] | -                        | [102] | - | [103] | - | [104] | - | [105] | - |
| [106] | -                        | [107] | - | [108] | - | [109] | - | [110] | - |
| [111] | -                        | [112] | - | [113] | - | [114] | - | [115] | - |
| [116] | -                        | [117] | - | [118] | - | [119] | - | [120] | - |
| [121] | -                        | [122] | - | [123] | - | [124] | - | [125] | - |
| [126] | -                        | [127] | - | [128] | - | [129] | - | [130] | - |
| [131] | -                        | [132] | - | [133] | - | [134] | - | [135] | - |
| [136] | -                        | [137] | - | [138] | - | [139] | - | [140] | - |
| [141] | -                        | [142] | - | [143] | - | [144] | - | [145] | - |
| [146] | -                        | [147] | - | [148] | - | [149] | - | [150] | - |
| [151] | -                        | [152] | - | [153] | - | [154] | - | [155] | - |
| [156] | -                        | [157] | - | [158] | - | [159] | - | [160] | - |
| [161] | -                        | [162] | - | [163] | - | [164] | - | [165] | - |
| [166] | -                        | [167] | - | [168] | - | [169] | - | [170] | - |
| [171] | -                        | [172] | - | [173] | - | [174] | - | [175] | - |
| [176] | -                        | [177] | - | [178] | - | [179] | - | [180] | - |
| [181] | -                        | [182] | - | [183] | - | [184] | - | [185] | - |
| [186] | -                        | [187] | - | [188] | - | [189] | - | [190] | - |
| [191] | 'Clack2002/1'            |       |   | [192] |   | [193] |   | [194] |   |
| [196] |                          | [197] |   | [198] |   | [199] |   | [200] |   |
| [201] | -                        | [202] | - | [203] | - | [204] | - | [205] | - |
| [206] | -                        | [207] | - | [208] | - | [209] | - | [210] | - |
| [211] | -                        | [212] | - | [213] | - | [214] | - | [215] | - |
| [216] | -                        | [217] | - | [218] | - | [219] | - | [220] | - |
| [221] | -                        | [222] | - | [223] | - | [224] | - | [225] | - |
| [226] | -                        | [227] | - | [228] | - | [229] | - | [230] | - |

|       |   |                       |   |                          |   |                |   |                      |   |
|-------|---|-----------------------|---|--------------------------|---|----------------|---|----------------------|---|
| [231] | - | [232]                 | - | [233]                    | - | [234]          | - | [235]                | - |
| [236] | - | [237]                 | - | [238]                    | - | [239]          | - | [240]                | - |
| [241] | - | 'Anderson2001/1'      |   | [242]                    | - | [243]          | - | [244]                | - |
| [246] | - | [247]                 | - | [248]                    | - | [249]          | - | [250]                | - |
| [251] | - | [252]                 | - | [253]                    | - | [254]          | - | [255]                | - |
| [256] | - | [257]                 | - | [258]                    | - | [259]          | - | [260]                | - |
| [261] | - | [262]                 | - | [263]                    | - | [264]          | - | [265]                | - |
| [266] | - | [267]                 | - | [268]                    | - | [269]          | - | [270]                | - |
| [271] | - | [272]                 | - | [273]                    | - | [274]          | - | [275]                | - |
| [276] | - | [277]                 | - | [278]                    | - | [279]          | - | [280]                | - |
| [281] | - | [282]                 | - | [283]                    | - | [284]          | - | [285]                | - |
| [286] | - | [287]                 | - | [288]                    | - | 'Clack2001/1'  |   | [289]                | - |
| [291] | - | [292]                 | - | [293]                    | - | [294]          | - | [295]                | - |
| [296] | - | [297]                 | - | [298]                    | - | [299]          | - | 'Damiani2001/1'      |   |
| [301] | - | [302]                 | - | [303]                    | - | [304]          | - | [305]                | - |
| [306] | - | [307]                 | - | [308]                    | - | [309]          | - | [310]                | - |
| [311] | - | [312]                 | - | [313]                    | - | [314]          | - | [315]                | - |
| [316] | - | [317]                 | - | [318]                    | - | [319]          | - | [320]                | - |
| [321] | - | 'Gardner2001/1'       |   | [322]                    | - | [323]          | - | [324]                | - |
| [326] | - | [327]                 | - | [328]                    | - | [329]          | - | 'Laurin-Gijon2001/1' |   |
| [331] | - | [332]                 | - | [333]                    | - | [334]          | - | [335]                | - |
| [336] | - | [337]                 | - | [338]                    | - | [339]          | - | [340]                | - |
| [341] | - | [342]                 | - | 'Ahlberg_et_al.2000/1'   |   | [343]          | - | [344]                | - |
| [346] | - | [347]                 | - | [348]                    | - | 'Schoch2000/1' |   | [349]                | - |
| [351] | - | [352]                 | - | [353]                    | - | [354]          | - | [355]                | - |
| [356] | - | [357]                 | - | [358]                    | - | [359]          | - | [360]                | - |
| [361] | - | [362]                 | - | 'Steyer2000/1'           |   | [363]          | - | [364]                | - |
| [366] | - | [367]                 | - | 'Warren-Marsicano2000/1' |   | [368]          | - | [369]                | - |
| [371] | - | [372]                 | - | [373]                    | - | [374]          | - | [375]                | - |
| [376] | - | [377]                 | - | [378]                    | - | [379]          | - | [380]                | - |
| [381] | - | [382]                 | - | [383]                    | - | [384]          | - | 'Yates-Warren2000/1' |   |
| [386] | - | [387]                 | - | [388]                    | - | [389]          | - | [390]                | - |
| [391] | - | [392]                 | - | [393]                    | - | [394]          | - | [395]                | - |
| [396] | - | [397]                 | - | [398]                    | - | [399]          | - | [400]                | - |
| [401] | - | [402]                 | - | [403]                    | - | [404]          | - | [405]                | - |
| [406] | - | [407]                 | - | [408]                    | - | [409]          | - | [410]                | - |
| [411] | - | [412]                 | - | [413]                    | - | [414]          | - | [415]                | - |
| [416] | - | [417]                 | - | [418]                    | - | [419]          | - | [420]                | - |
| [421] | - | [422]                 | - | [423]                    | - | [424]          | - | 'Lurin-Reisz1999/1'  |   |
| [426] | - | [427]                 | - | [428]                    | - | [429]          | - | [430]                | - |
| [431] | - | [432]                 | - | [433]                    | - | [434]          | - | [435]                | - |
| [436] | - | [437]                 | - | [438]                    | - | [439]          | - | [440]                | - |
| [441] | - | [442]                 | - | [443]                    | - | [444]          | - | [445]                | - |
| [446] | - | [447]                 | - | [448]                    | - | [449]          | - | [450]                | - |
| [451] | - | [452]                 | - | [453]                    | - | [454]          | - | [455]                | - |
| [456] | - | [457]                 | - | [458]                    | - | [459]          | - | [460]                | - |
| [461] | - | [462]                 | - | [463]                    | - | [464]          | - | [465]                | - |
| [466] | - | [467]                 | - | [468]                    | - | [469]          | - | [470]                | - |
| [471] | - | [472]                 | - | 'Marsicano1999/1'        |   | [473]          | - | [474]                | - |
| [476] | - | [477]                 | - | [478]                    | - | [479]          | - | [480]                | - |
| [481] | - | [482]                 | - | [483]                    | - | [484]          | - | [485]                | - |
| [486] | - | [487]                 | - | [488]                    | - | [489]          | - | [490]                | - |
| [491] | - | [492]                 | - | [493]                    | - | [494]          | - | [495]                | - |
| [496] | - | [497]                 | - | [498]                    | - | [499]          | - | [500]                | - |
| [501] | - | [502]                 | - | [503]                    | - | [504]          | - | [505]                | - |
| [506] | - | [507]                 | - | [508]                    | - | [509]          | - | [510]                | - |
| [511] | - | 'Ahlberg-Clack1998/1' |   | [512]                    | - | [513]          | - | [514]                | - |
| [516] | - | [517]                 | - | [518]                    | - | [519]          | - | [520]                | - |
| [521] | - | [522]                 | - | [523]                    | - | [524]          | - | [525]                | - |
| [526] | - | [527]                 | - | [528]                    | - | [529]          | - | [530]                | - |
| [531] | - | [532]                 | - | [533]                    | - | 'Clack1998/1'  |   | [534]                | - |
| [536] | - | [537]                 | - | [538]                    | - | [539]          | - | [540]                | - |
| [541] | - | [542]                 | - | [543]                    | - | [544]          | - | [545]                | - |

|       |                         |       |                        |       |                      |       |                               |       |                         |
|-------|-------------------------|-------|------------------------|-------|----------------------|-------|-------------------------------|-------|-------------------------|
| [546] | —                       | [547] | 'Holmes et al1998/1'   | [548] | —                    | [549] | —                             | [550] | —                       |
| [551] | —                       | [552] | —                      | [553] | —                    | [554] | —                             | [555] | —                       |
| [556] | —                       | [557] | —                      | [558] | —                    | [559] | 'Laurin1998a/1'               | [560] | —                       |
| [561] | —                       | [562] | —                      | [563] | —                    | [564] | —                             | [565] | —                       |
| [566] | —                       | [567] | —                      | [568] | —                    | [569] | —                             | [570] | —                       |
| [571] | —                       | [572] | —                      | [573] | —                    | [574] | —                             | [575] | —                       |
| [576] | —                       | [577] | —                      | [578] | —                    | [579] | —                             | [580] | —                       |
| [581] | —                       | [582] | —                      | [583] | —                    | [584] | —                             | [585] | —                       |
| [586] | —                       | [587] | —                      | [588] | —                    | [589] | —                             | [590] | —                       |
| [591] | —                       | [592] | —                      | [593] | —                    | [594] | —                             | [595] | —                       |
| [596] | —                       | [597] | —                      | [598] | —                    | [599] | —                             | [600] | —                       |
| [601] | —                       | [602] | 'Laurin1998b/1'        | [603] | —                    | [604] | —                             | [605] | —                       |
| [606] | —                       | [607] | —                      | [608] | —                    | [609] | —                             | [610] | —                       |
| [611] | —                       | [612] | —                      | [613] | —                    | [614] | —                             | [615] | —                       |
| [616] | —                       | [617] | —                      | [618] | —                    | [619] | —                             | [620] | —                       |
| [621] | —                       | [622] | —                      | [623] | —                    | [624] | —                             | [625] | —                       |
| [626] | —                       | [627] | —                      | [628] | —                    | [629] | —                             | [630] | —                       |
| [631] | —                       | [632] | —                      | [633] | —                    | [634] | —                             | [635] | —                       |
| [636] | —                       | [637] | —                      | [638] | —                    | [639] | —                             | [640] | —                       |
| [641] | —                       | [642] | —                      | [643] | —                    | [644] | —                             | [645] | —                       |
| [646] | —                       | [647] | —                      | [648] | —                    | [649] | 'Milner-Sequeira1998/1'       | [650] | —                       |
| [651] | —                       | [652] | —                      | [653] | —                    | [654] | 'Sumida-Berman-Martens1998/1' | [655] | —                       |
| [656] | —                       | [657] | —                      | [658] | —                    | [659] | 'Clack1997/1'                 | [660] | —                       |
| [661] | —                       | [662] | —                      | [663] | —                    | [664] | —                             | [665] | —                       |
| [666] | —                       | [667] | —                      | [668] | —                    | [669] | —                             | [670] | —                       |
| [671] | 'Coates1996/1'          | [672] | —                      | [673] | —                    | [674] | —                             | [675] | —                       |
| [676] | —                       | [677] | —                      | [678] | —                    | [679] | —                             | [680] | —                       |
| [681] | —                       | [682] | —                      | [683] | —                    | [684] | —                             | [685] | —                       |
| [686] | 'Laurin1996/1'          | [687] | —                      | [688] | —                    | [689] | —                             | [690] | —                       |
| [691] | —                       | [692] | 'Sequeira1996/1'       | [693] | —                    | [694] | —                             | [695] | —                       |
| [696] | —                       | [697] | —                      | [698] | 'Carroll1995/1'      | [699] | —                             | [700] | —                       |
| [701] | —                       | [702] | —                      | [703] | —                    | [704] | —                             | [705] | —                       |
| [706] | —                       | [707] | —                      | [708] | —                    | [709] | —                             | [710] | —                       |
| [711] | —                       | [712] | —                      | [713] | —                    | [714] | —                             | [715] | —                       |
| [716] | —                       | [717] | —                      | [718] | —                    | [719] | —                             | [720] | —                       |
| [721] | —                       | [722] | —                      | [723] | —                    | [724] | —                             | [725] | —                       |
| [726] | —                       | [727] | —                      | [728] | 'Laurin-Reisz1997/1' | [729] | —                             | [730] | —                       |
| [731] | —                       | [732] | —                      | [733] | —                    | [734] | —                             | [735] | —                       |
| [736] | —                       | [737] | —                      | [738] | —                    | [739] | —                             | [740] | —                       |
| [741] | —                       | [742] | —                      | [743] | —                    | [744] | —                             | [745] | —                       |
| [746] | —                       | [747] | —                      | [748] | —                    | [749] | —                             | [750] | —                       |
| [751] | —                       | [752] | —                      | [753] | —                    | [754] | —                             | [755] | —                       |
| [756] | —                       | [757] | —                      | [758] | —                    | [759] | —                             | [760] | —                       |
| [761] | —                       | [762] | —                      | [763] | —                    | [764] | —                             | [765] | —                       |
| [766] | —                       | [767] | —                      | [768] | —                    | [769] | 'Lebedev-Coates1995/1'        | [770] | —                       |
| [771] | —                       | [772] | —                      | [773] | —                    | [774] | —                             | [775] | —                       |
| [776] | —                       | [777] | 'Sengupta1995/1'       | [778] | —                    | [779] | —                             | [780] | —                       |
| [781] | —                       | [782] | —                      | [783] | 'Daly1994/1'         | [784] | —                             | [785] | —                       |
| [786] | —                       | [787] | —                      | [788] | —                    | [789] | —                             | [790] | —                       |
| [791] | —                       | [792] | —                      | [793] | —                    | [794] | —                             | [795] | 'Milner-Sequeira1994/1' |
| [796] | —                       | [797] | —                      | [798] | —                    | [799] | —                             | [800] | —                       |
| [801] | —                       | [802] | —                      | [803] | —                    | [804] | —                             | [805] | 'Milner1993a/1'         |
| [806] | —                       | [807] | —                      | [808] | —                    | [809] | —                             | [810] | —                       |
| [811] | —                       | [812] | —                      | [813] | —                    | [814] | —                             | [815] | —                       |
| [816] | —                       | [817] | —                      | [818] | —                    | [819] | —                             | [820] | —                       |
| [821] | —                       | [822] | —                      | [823] | —                    | [824] | —                             | [825] | —                       |
| [826] | —                       | [827] | 'Milner1993b/1'        | [828] | —                    | [829] | —                             | [830] | —                       |
| [831] | —                       | [832] | —                      | [833] | —                    | [834] | —                             | [835] | —                       |
| [836] | —                       | [837] | 'Milner1993c/1'        | [838] | —                    | [839] | —                             | [840] | —                       |
| [841] | —                       | [842] | —                      | [843] | —                    | [844] | —                             | [845] | —                       |
| [846] | 'Sequeira-Milner1993/1' | [847] | —                      | [848] | —                    | [849] | —                             | [850] | —                       |
| [851] | —                       | [852] | 'Trueb-Cloutier1991/1' | [853] | —                    | [854] | —                             | [855] | —                       |
| [856] | —                       | [857] | —                      | [858] | —                    | [859] | —                             | [860] | —                       |





[illegible][illegible][illegible][illegible][illegible]

????????????????????11111111110000????????????????????????????????????????  
 ?????????????????????????????????????????????????????????????

Almasaurus

[illegible]

## Amphibamus

Anconastes

[illegible]

## Angusaurus

[illegible]

Anthracosaurus



















[illegible][illegible][illegible][illegible][illegible]



## Dissorophus

Doleserpeton

Dolichopareias

Dutuitosaurus

Dvinosaurus

[illegible]





```

????????????????????????????????????????????????????????111111000001????????????????????
????????????????????????????????????????????????????????????????????????????????????
????????????????????????????????????????????????????????????????????????????????????
????????????????????????????????????????????????????????111000000100????????????????
????????????????????????????????????????????????????????????????????????????????
????????????????????????????????????????????????????????

```

## Eryops

Eryosuchus

Erythrobatrachus

[illegible]

## Eucritta

[illegible]

Eugyrinus

[illegible]





```

????????????????????????????????????????????????????????????????????????????????????????????????
??1111111111110000000000000000000011111111100000000110000000000000000000000000000000000000000

```



[illegible]

[illegible][illegible][illegible][illegible][illegible]









Ophiderpeton

## Paleothyris

Panderichthys

Pantylus

Paracyclotosaurus

.....

# Pariotichus

# Parioxys

Paroto.madagascariensis

Paroto.nasutus

Paroto.orenburgensis

[illegible]





[illegible]















Tatrasuchus

Tersomius

Tertrema

# Thoosuchus

Trematosaurus

[illegible]







Wantzosaurs

Watsonisuchus

Wellesaurus

Westlothiana

[illegible]

[illegible][illegible]

```

????????????????????????????????????????????111111100011000000????????????????????????????????
????????????????????????????????????????????????????????????????????????????????????????????
????????????????????????????????????????????????????????????????????????????????????????????
????????????????????????????????????????????????????????????????????????????????????????????
????????????????????????????????????????????11111110000000000111111111111100000000000000000
000000000????????????????????????????????????????????????????????11000010????????????????????
????????????????????????????????????????????????????????????????????????????????????????????
????????????????????????????????????????????????????????????????????????????????????????????
????????????????????????????????????????????110000????????????????????????????????????????????
????????????????????????????????????????????11101000011110000000000000000000000000000000000
0001001110000000000????????????????????????????????????????

```

[illegible]

## Electronic Appendix B

[MacClade 3.05 registered to Mark Thomas, Biol. Anth. Cambridge.]

```
BEGIN DATA;
DIMENSIONS  NTAx=225 NCHAR=710;
FORMAT MISSING=? GAP=- ;
CHARLABELS
```

|       |                          |       |                 |       |                                |       |                     |       |                |
|-------|--------------------------|-------|-----------------|-------|--------------------------------|-------|---------------------|-------|----------------|
| [1]   | 'Klembara-Ruta2003/1'    | [2]   |                 | [3]   |                                | [4]   |                     | [5]   |                |
| [6]   |                          | [7]   |                 | [8]   |                                | [9]   |                     | [10]  |                |
| [11]  |                          | [12]  |                 | [13]  |                                | [14]  |                     | [15]  |                |
| [16]  |                          | [17]  |                 | [18]  |                                | [19]  |                     | [20]  |                |
| [21]  |                          | [22]  |                 | [23]  |                                | [24]  |                     | [25]  |                |
| [26]  |                          | [27]  |                 | [28]  |                                | [29]  |                     | [30]  |                |
| [31]  | 'Anderson_2003/1'        | [32]  |                 | [33]  |                                | [34]  |                     | [35]  |                |
| [36]  |                          | [37]  |                 | [38]  |                                | [39]  |                     | [40]  |                |
| [41]  | 'Damiani-Kitching2003/1' |       |                 | [42]  |                                | [43]  |                     | [44]  |                |
|       |                          |       |                 |       |                                |       |                     |       | [45]           |
| [46]  |                          | [47]  |                 | [48]  |                                | [49]  |                     | [50]  |                |
| [51]  |                          | [52]  |                 | [53]  |                                | [54]  |                     | [55]  |                |
| [56]  |                          | [57]  |                 | [58]  |                                | [59]  | 'Ruta-Coates2003/1' |       | [60]           |
| [61]  |                          | [62]  |                 | [63]  |                                | [64]  |                     | [65]  |                |
| [66]  |                          | [67]  |                 | [68]  |                                | [69]  |                     | [70]  |                |
| [71]  |                          | [72]  |                 | [73]  |                                | [74]  |                     | [75]  |                |
| [76]  |                          | [77]  |                 | [78]  |                                | [79]  |                     | [80]  |                |
| [81]  |                          | [82]  |                 | [83]  |                                | [84]  |                     | [85]  |                |
| [86]  | 'Ruta_et_al2003/1'       |       | [87]            |       | [88]                           |       | [89]                |       | [90]           |
| [91]  |                          | [92]  |                 | [93]  |                                | [94]  |                     | [95]  |                |
| [96]  |                          | [97]  |                 | [98]  |                                | [99]  |                     | [100] |                |
| [101] |                          | [102] |                 | [103] |                                | [104] |                     | [105] |                |
| [106] |                          | [107] |                 | [108] |                                | [109] |                     | [110] |                |
| [111] |                          | [112] |                 | [113] |                                | [114] |                     | [115] |                |
| [116] |                          | [117] |                 | [118] |                                | [119] |                     | [120] |                |
| [121] |                          | [122] |                 | [123] |                                | [124] |                     | [125] |                |
| [126] |                          | [127] |                 | [128] |                                | [129] |                     | [130] |                |
| [131] |                          | [132] |                 | [133] |                                | [134] |                     | [135] |                |
| [136] |                          | [137] |                 | [138] |                                | [139] |                     | [140] |                |
| [141] |                          | [142] |                 | [143] |                                | [144] |                     | [145] |                |
| [146] |                          | [147] |                 | [148] |                                | [149] |                     | [150] |                |
| [151] |                          | [152] |                 | [153] |                                | [154] |                     | [155] |                |
| [156] |                          | [157] |                 | [158] |                                | [159] |                     | [160] |                |
| [161] |                          | [162] |                 | [163] |                                | [164] |                     | [165] |                |
| [166] |                          | [167] |                 | [168] | 'Coates,_Jeffery_&_Ruta2003/1' |       |                     |       | [169]          |
| [170] |                          |       |                 |       |                                |       |                     |       |                |
| [171] |                          | [172] |                 | [173] |                                | [174] |                     | [175] | 'Steyer2002/1' |
| [176] |                          | [177] |                 | [178] |                                | [179] |                     | [180] |                |
| [181] |                          | [182] |                 | [183] |                                | [184] |                     | [185] |                |
| [186] |                          | [187] |                 | [188] |                                | [189] |                     | [190] |                |
| [191] | 'Clack2002/1'            |       | [192]           |       | [193]                          |       |                     | [194] |                |
| [196] |                          | [197] |                 | [198] |                                | [199] |                     | [200] |                |
| [201] |                          | [202] |                 | [203] |                                | [204] |                     | [205] |                |
| [206] |                          | [207] |                 | [208] |                                | [209] |                     | [210] |                |
| [211] |                          | [212] |                 | [213] |                                | [214] |                     | [215] |                |
| [216] |                          | [217] | 'McGowan2002/1' |       | [218]                          |       |                     | [219] |                |
| [221] |                          | [222] |                 | [223] |                                | [224] |                     | [225] |                |
| [226] |                          | [227] |                 | [228] |                                | [229] |                     | [230] |                |
| [231] |                          | [232] |                 | [233] |                                | [234] |                     | [235] |                |
| [236] |                          | [237] |                 | [238] |                                | [239] |                     | [240] |                |
| [241] | 'Anderson2001/1'         |       | [242]           |       | [243]                          |       |                     | [244] |                |
| [246] |                          | [247] |                 | [248] |                                | [249] |                     | [250] |                |
| [251] |                          | [252] |                 | [253] |                                | [254] |                     | [255] |                |
| [256] |                          | [257] |                 | [258] |                                | [259] |                     | [260] |                |
| [261] |                          | [262] |                 | [263] |                                | [264] |                     | [265] |                |
| [266] |                          | [267] |                 | [268] |                                | [269] |                     | [270] |                |
| [271] |                          | [272] |                 | [273] |                                | [274] |                     | [275] |                |
| [276] |                          | [277] |                 | [278] |                                | [279] |                     | [280] |                |
| [281] |                          | [282] |                 | [283] |                                | [284] |                     | [285] |                |
| [286] |                          | [287] |                 | [288] | 'Clack2001/1'                  |       |                     | [289] |                |
| [291] |                          | [292] |                 | [293] |                                | [294] |                     | [295] |                |
| [296] |                          | [297] |                 | [298] |                                | [299] | 'Damiani2001/1'     |       | [300]          |
| [301] |                          | [302] |                 | [303] |                                | [304] |                     | [305] |                |
| [306] |                          | [307] |                 | [308] |                                | [309] |                     | [310] |                |

|       |                      |       |                        |       |                                  |       |                         |       |                        |
|-------|----------------------|-------|------------------------|-------|----------------------------------|-------|-------------------------|-------|------------------------|
| [311] | —                    | [312] | —                      | [313] | —                                | [314] | —                       | [315] | —                      |
| [316] | —                    | [317] | —                      | [318] | —                                | [319] | —                       | [320] | —                      |
| [321] | 'Gardner2001/1'      | [322] | —                      | [323] | —                                | [324] | —                       | [325] | —                      |
| [326] | —                    | [327] | —                      | [328] | —                                | [329] | 'Laurin-Gijon2001/1'    | [330] | —                      |
| [331] | —                    | [332] | —                      | [333] | —                                | [334] | —                       | [335] | —                      |
| [336] | —                    | [337] | —                      | [338] | —                                | [339] | —                       | [340] | —                      |
| [341] | —                    | [342] | 'Ahlberg_et_al.2000/1' | [343] | —                                | [344] | —                       | [345] | —                      |
| [346] | —                    | [347] | —                      | [348] | 'Schoch2000/1'                   | [349] | —                       | [350] | —                      |
| [351] | —                    | [352] | —                      | [353] | —                                | [354] | —                       | [355] | —                      |
| [356] | —                    | [357] | —                      | [358] | —                                | [359] | —                       | [360] | —                      |
| [361] | —                    | [362] | 'Steyer2000/1'         | [363] | —                                | [364] | —                       | [365] | —                      |
| [366] | —                    | [367] | 'Yates-Warren2000/1'   | [368] | —                                | [369] | —                       | [370] | —                      |
| [371] | —                    | [372] | —                      | [373] | —                                | [374] | —                       | [375] | —                      |
| [376] | —                    | [377] | —                      | [378] | —                                | [379] | —                       | [380] | —                      |
| [381] | —                    | [382] | —                      | [383] | —                                | [384] | —                       | [385] | —                      |
| [386] | —                    | [387] | —                      | [388] | —                                | [389] | —                       | [390] | —                      |
| [391] | —                    | [392] | —                      | [393] | —                                | [394] | —                       | [395] | —                      |
| [396] | —                    | [397] | —                      | [398] | —                                | [399] | —                       | [400] | —                      |
| [401] | —                    | [402] | —                      | [403] | —                                | [404] | —                       | [405] | —                      |
| [406] | —                    | [407] | 'Laurin-Reisz1999/1'   | [408] | —                                | [409] | —                       | [410] | —                      |
| [411] | —                    | [412] | —                      | [413] | —                                | [414] | —                       | [415] | —                      |
| [416] | —                    | [417] | —                      | [418] | —                                | [419] | —                       | [420] | —                      |
| [421] | —                    | [422] | —                      | [423] | —                                | [424] | —                       | [425] | —                      |
| [426] | —                    | [427] | —                      | [428] | —                                | [429] | —                       | [430] | —                      |
| [431] | —                    | [432] | —                      | [433] | —                                | [434] | —                       | [435] | —                      |
| [436] | —                    | [437] | —                      | [438] | —                                | [439] | —                       | [440] | —                      |
| [441] | —                    | [442] | —                      | [443] | —                                | [444] | —                       | [445] | —                      |
| [446] | —                    | [447] | —                      | [448] | —                                | [449] | —                       | [450] | —                      |
| [451] | —                    | [452] | —                      | [453] | —                                | [454] | —                       | [455] | 'Marsicano1999/1'      |
| [456] | —                    | [457] | —                      | [458] | —                                | [459] | —                       | [460] | —                      |
| [461] | —                    | [462] | —                      | [463] | 'Paton_et_al1999/1'              | [464] | —                       | [465] | —                      |
| [466] | —                    | [467] | —                      | [468] | —                                | [469] | —                       | [470] | —                      |
| [471] | —                    | [472] | —                      | [473] | —                                | [474] | —                       | [475] | —                      |
| [476] | —                    | [477] | —                      | [478] | 'Ahlberg1998/1'                  | [479] | —                       | [480] | —                      |
| [481] | —                    | [482] | —                      | [483] | —                                | [484] | —                       | [485] | —                      |
| [486] | —                    | [487] | —                      | [488] | —                                | [489] | —                       | [490] | —                      |
| [491] | —                    | [492] | —                      | [493] | —                                | [494] | 'Ahlberg-Clack1998/1'   | [495] | —                      |
| [496] | —                    | [497] | —                      | [498] | —                                | [499] | —                       | [500] | —                      |
| [501] | —                    | [502] | —                      | [503] | —                                | [504] | —                       | [505] | —                      |
| [506] | —                    | [507] | —                      | [508] | —                                | [509] | —                       | [510] | —                      |
| [511] | —                    | [512] | —                      | [513] | —                                | [514] | —                       | [515] | —                      |
| [516] | 'Holmes_et_al1998/1' | [517] | —                      | [518] | —                                | [519] | —                       | [520] | —                      |
| [521] | —                    | [522] | —                      | [523] | —                                | [524] | —                       | [525] | —                      |
| [526] | —                    | [527] | —                      | [528] | 'Milner_Sequeira_1998/1'         | [529] | —                       | [530] | —                      |
| [531] | —                    | [532] | —                      | [533] | 'Sumida,_Berman_&_Martens1988/1' | [534] | —                       |       | —                      |
| [535] | —                    | [536] | —                      | [537] | —                                | [538] | 'Laurin1996/1'          | [539] | [540]                  |
| [541] | —                    | [542] | —                      | [543] | —                                | [544] | 'Sequeira1996/1'        | [545] | —                      |
| [546] | —                    | [547] | —                      | [548] | —                                | [549] | —                       | [550] | 'Sengupta1995/1'       |
| [551] | —                    | [552] | —                      | [553] | —                                | [554] | —                       | [555] | —                      |
| [556] | 'Daly1994/1'         | [557] | —                      | [558] | —                                | [559] | —                       | [560] | —                      |
| [561] | —                    | [562] | —                      | [563] | —                                | [564] | —                       | [565] | —                      |
| [566] | —                    | [567] | —                      | [568] | 'Milner1993a/1'                  | [569] | —                       | [570] | —                      |
| [571] | —                    | [572] | —                      | [573] | —                                | [574] | —                       | [575] | —                      |
| [576] | —                    | [577] | —                      | [578] | —                                | [579] | —                       | [580] | —                      |
| [581] | —                    | [582] | —                      | [583] | —                                | [584] | —                       | [585] | —                      |
| [586] | —                    | [587] | —                      | [588] | —                                | [589] | —                       | [590] | 'Milner1993b/1'        |
| [591] | —                    | [592] | —                      | [593] | —                                | [594] | —                       | [595] | —                      |
| [596] | —                    | [597] | —                      | [598] | —                                | [599] | —                       | [600] | 'Milner1993c/1'        |
| [601] | —                    | [602] | —                      | [603] | —                                | [604] | —                       | [605] | —                      |
| [606] | —                    | [607] | —                      | [608] | —                                | [609] | 'Sequeira-Milner1993/1' | [610] | —                      |
| [611] | —                    | [612] | —                      | [613] | —                                | [614] | —                       | [615] | 'Trueb-Cloutier1991/1' |
| [616] | —                    | [617] | —                      | [618] | —                                | [619] | —                       | [620] | —                      |



















[illegible]











[illegible][illegible]
